# Supplementary material for: The Effectiveness of Compartmentalized Bone Graft Sponges Made Using Complementary Bone Graft Materials and Succinylated Chitosan Hydrogels
Source: MDPI journal article supplement (doi:10.3390/biomedicines9121765), 2021-11-25
Supplement: s1 [file s1]

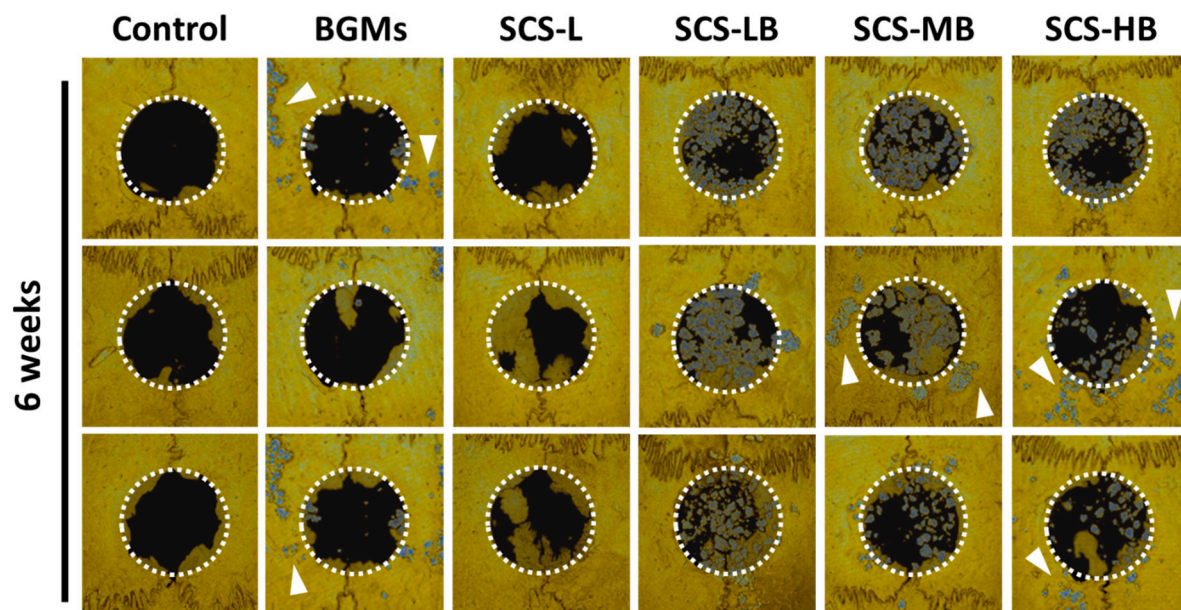

**Figure S1.** In vivo characterization of new bone tissue formation after implantation of control (defect only), BGMs, SCS-L, SCS-LB, SCS-MB, and SCS-HB hydrogel sponges: all  $\mu$ CT images of each group after 6 weeks of implantation.
